# Supplementary material for: Fabrication of local micro-contacts to silicon solar cells by dewetting of ultrathin polymer films
Source: Royal Society of Chemistry journal article supplement (doi:10.1039/c9ra10457g), 2020-01-01
Supplement: c9ra10457g1.pdf [file c9ra10457g1.pdf]

Electronic Supplementary Information

## Fabrication of local micro-contacts to silicon solar cells by dewetting of ultrathin polymer films

Chih-Yao Chen, Jyun-Hao Yang, Tzu-Yu Lin, Hao-Yuan Ma and I-Chen Chen\*

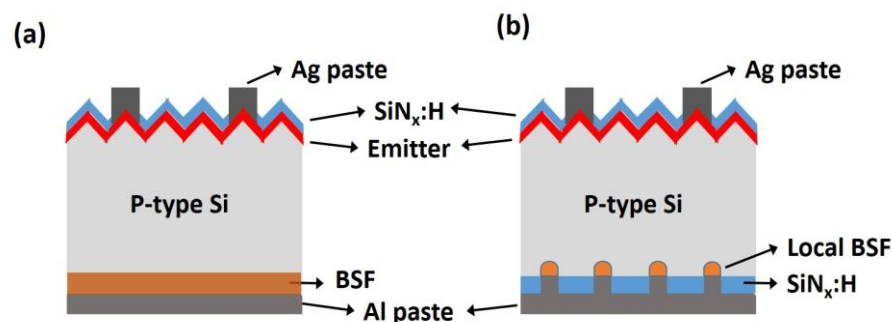

**Fig. S1** Schematic cross-sections of (a) reference solar cell and (b) PERC solar cell.

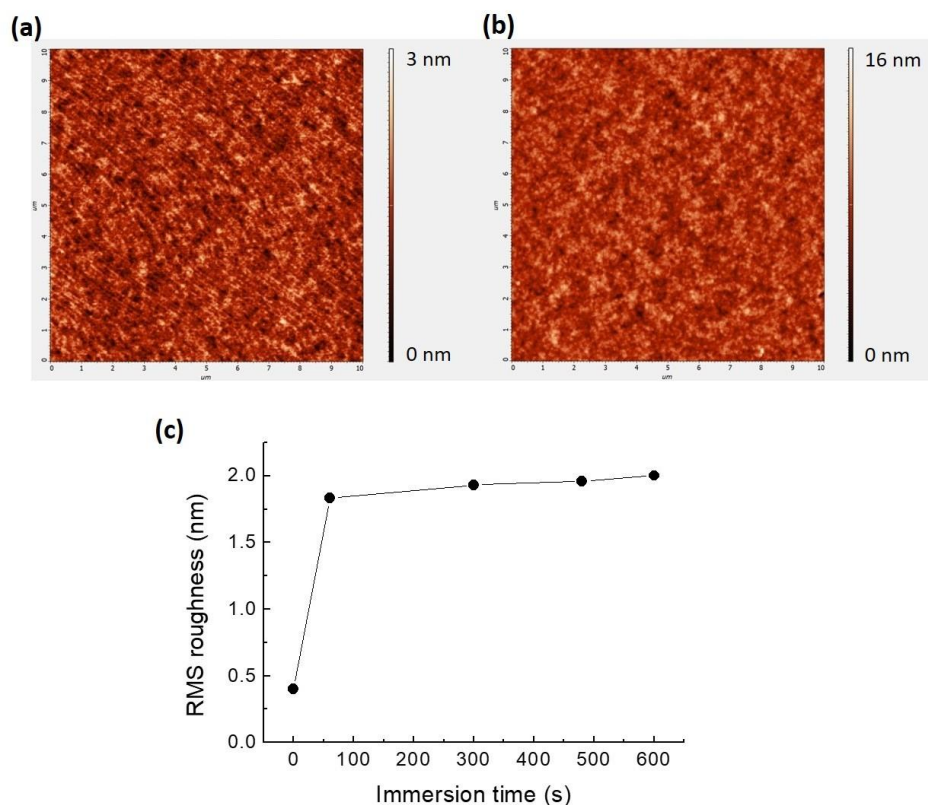

**Fig. S2** Representative AFM morphologies of 50 nm-thick PS films on top of SiN<sub>x</sub>-passivated Si wafers (a) before and (b) after immersion in acetone for 600 s. The scan size is 10 μm × 10 μm (c) Plot of surface RMS roughness as a function of immersion time for the PS films.
